# Supplementary material for: Respiratory loss during late-growing season determines the net carbon dioxide sink in northern permafrost regions
Source: PubMed Central journal article supplement (PMC9512808; doi:10.1038/s41467-022-33293-x), 2022-09-26
Supplement: 41467_2022_33293_MOESM1_ESM.pdf [file 41467_2022_33293_MOESM1_ESM.pdf]

**This supplementary file includes:**

1. Tables S1
2. Figs. S1 to S15
3. Supplementary References
4. Supplementary text to describe in full detail about using mixed effects model analysis of net CO<sub>2</sub> trends over permafrost and non-permafrost regions using ACIs

Table S1: NHL Eddy Covariance (EC) sites (Fig. S1, n = 48) from FLUXNET2015 used in the analysis. Detailed descriptions of the FLUXNET2015 dataset, including reference for each site, can be found in <sup>1</sup>.

| SITE_ID | longitude | latitude | IGBP | YRS            | MAT   | MAP   | ELE    | %P |
|---------|-----------|----------|------|----------------|-------|-------|--------|----|
| CA-Man  | -98.4808  | 55.8796  | ENF  | 15 (1994-2008) | -3.2  | 520   | 259    | NA |
| CA-NS1  | -98.4839  | 55.8792  | ENF  | 5 (2001-2005)  | -2.89 | 500   | 260    | NA |
| CA-NS2  | -98.5247  | 55.9058  | ENF  | 5 (2001-2005)  | -2.88 | 500   | 260    | NA |
| CA-NS3  | -98.3822  | 55.9117  | ENF  | 5 (2001-2005)  | -2.87 | 502   | 260    | NA |
| CA-NS4  | -98.3806  | 55.9144  | ENF  | 4 (2002-2005)  | -2.87 | 502   | 260    | NA |
| CA-NS5  | -98.485   | 55.8631  | ENF  | 5 (2001-2005)  | -2.86 | 500   | 260    | NA |
| CA-NS6  | -98.9644  | 55.9167  | OSH  | 5 (2001-2005)  | -3.08 | 495   | 244    | NA |
| CA-NS7  | -99.9483  | 56.6358  | OSH  | 4 (2002-2005)  | -3.52 | 483   | 297    | NA |
| CA-Oas  | -106.198  | 53.6289  | DBF  | 15 (1996-2010) | 0.34  | 429   | 530    | NA |
| CA-Obs  | -105.118  | 53.9872  | ENF  | 14 (1997-2010) | 0.79  | 406   | 628.94 | 14 |
| CA-SF1  | -105.818  | 54.485   | ENF  | 4 (2003-2006)  | 0.4   | 470   | 536    | NA |
| CA-SF2  | -105.878  | 54.2539  | ENF  | 5 (2001-2005)  | 0.4   | 470   | 520    | 14 |
| CA-SF3  | -106.005  | 54.0916  | OSH  | 6 (2001-2006)  | 0.4   | 470   | 540    | 14 |
| DE-Akm  | 13.6834   | 53.8662  | WET  | 6 (2009-2014)  | 8.7   | 558   | -1     | NA |
| DE-Hai  | 10.453    | 51.0792  | DBF  | 13 (2000-2012) | 8.3   | 720   | 430    | NA |
| DE-Lnf  | 10.3678   | 51.3282  | DBF  | 11 (2002-2012) | 6.96  | 894.6 | 451    | NA |

|                     |          |         |     |                |       |        |       |     |
|---------------------|----------|---------|-----|----------------|-------|--------|-------|-----|
| DE-Obe              | 13.7213  | 50.7867 | ENF | 7 (2008-2014)  | 5.5   | 996    | 734   | NA  |
| DE-RuR              | 6.3041   | 50.6219 | GRA | 4 (2011-2014)  | 7.7   | 1033   | 514.7 | NA  |
| DE-Spw              | 14.0337  | 51.8923 | WET | 5 (2010-2014)  | 8.7   | 558    | 61    | NA  |
| DE-Tha              | 13.5652  | 50.9624 | ENF | 19 (1996-2014) | 8.2   | 843    | 385   | NA  |
| DK-Eng              | 12.1918  | 55.6905 | GRA | 4 (2005-2008)  | 8     | 613    | 10    | NA  |
| FI-Lom <sup>p</sup> | 24.2092  | 67.9972 | WET | 3 (2007-2009)  | -1.4  | 484    | 274   | NA  |
| FI-Sod              | 26.6378  | 67.3619 | ENF | 14 (2001-2014) | -1    | 500    | 180   | NA  |
| NL-Hor              | 5.0713   | 52.2404 | GRA | 8 (2004-2011)  | 10    | 800    | 2.2   | NA  |
| NL-Loo              | 5.7436   | 52.1666 | ENF | 18 (1996-2013) | 9.8   | 786    | 25    | NA  |
| RU-Che              | 161.3414 | 68.613  | WET | 4 (2002-2005)  | -11   | 197    | 6     | 100 |
| RU-Cok              | 147.4943 | 70.8291 | OSH | 12 (2003-2014) | -14.3 | 232    | 48    | 100 |
| RU-Fyo              | 32.9221  | 56.4615 | ENF | 17 (1998-2014) | 3.9   | 711    | 265   | NA  |
| RU-Ha1              | 90.0022  | 54.7252 | GRA | 3 (2002-2004)  | -0.07 | 591.87 | 446   | NA  |
| RU-Sam              | 126.4958 | 72.3738 | GRA | 13 (2002-2014) | NA    | NA     | NA    | 100 |
| RU-SkP              | 129.168  | 62.255  | DNF | 3 (2012-2014)  | NA    | NA     | 246   | 100 |
| RU-Tks              | 128.8878 | 71.5943 | GRA | 5 (2010-2014)  | -12.7 | 323    | 7     | 100 |
| SE-St1              | 19.0503  | 68.3542 | WET | 3 (2012-2014)  | -0.7  | 303    | 351   | 14  |
| US-Atq              | -157.409 | 70.4696 | WET | 6(2003-2008)   | -9.7  | 93     | 15    | 100 |
| US-Ivo              | -155.75  | 68.4865 | WET | 4(2004-2007)   | -8.28 | 304    | 568   | 100 |

|        |          |         |     |                |      |      |     |    |
|--------|----------|---------|-----|----------------|------|------|-----|----|
| US-Prr | -147.488 | 65.1237 | ENF | 4(2010-2013)   | -2   | 275  | 210 | 50 |
| BE-Bra | 4.51984  | 51.3076 | MF  | 23(1996-2014)  | 9.8  | 750  | 16  | NA |
| BE-Vie | 5.99808  | 50.3049 | MF  | 23(1996-2014)  | 7.8  | 1062 | 493 | NA |
| DK-Sor | 11.64464 | 55.4858 | DBF | 23(1996-2014)  | 8.2  | 660  | 40  | NA |
| FI-Hyy | 24.29477 | 61.8474 | ENF | 23(1996-2014)  | 3.8  | 709  | 181 | NA |
| FI-Let | 23.95952 | 60.6418 | ENF | 10(2009-2012)  | 4.6  | 627  | 119 | NA |
| FI-Sii | 24.19285 | 61.8326 | WET | 6 (2004-2010)  | 3.5  | 701  | NA  | NA |
| FI-Var | 29.61    | 67.7549 | ENF | 3 (2016-2018)  | -0.5 | 601  | NA  | NA |
| SE-Deg | 9.556539 | 64.1820 | WET | 18 (2001-2018) | 1.2  | 523  | NA  | NA |
| SE-Htm | 13.41897 | 56.0976 | ENF | 4 (2015-2018)  | 7.4  | 707  | NA  | NA |
| SE-Nor | 17.4795  | 60.0865 | ENF | 5 (2014-2018)  | 5.5  | 527  | NA  | NA |
| SE-Ros | 19.738   | 64.1725 | ENF | 5 (2014-2018)  | 1.8  | 614  | NA  | NA |
| SE-Svb | 19.7745  | 64.2561 | ENF | 5 (2014-2018)  | 1.8  | 614  | NA  | NA |

Note: IGBP: International Geosphere-Biosphere Programme (IGBP) land cover classifications. YRS: number of years with continuous measurement, including start and end years. MAT: mean annual temperature ( $^{\circ}\text{C}$ ). MAP: mean annual precipitation ( $\text{mm yr}^{-1}$ ). ELEV: elevation (meters). ENF: Evergreen Needleleaf Forests; NDF: Deciduous Needleleaf Forests; MF: Mixed Forests; OSH: Open Shrublands; WSA: Woody Savannas; SAV: Savannas, GRA: Grasslands; WET: Wetlands; CRO: Cropland. %P: percent of permafrost extent on the EC sites based on ESA CCI permafrost extent data (Fig 1b).

## Supplementary figures

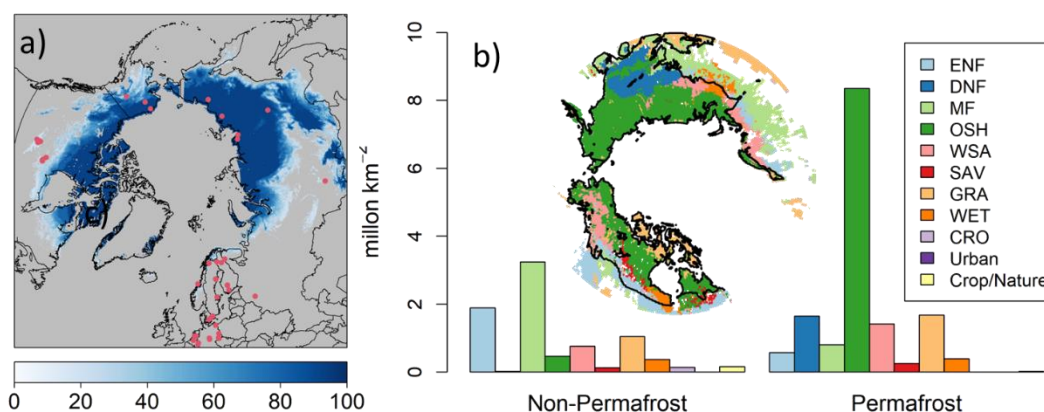

Fig. S1: (a) The spatial distribution of permafrost extent, overlaid with Eddy Covariance (EC) flux tower locations (red dots,  $n = 48$ ), (b) land cover types based on Moderate Resolution Imaging Spectroradiometer (MODIS) International Geosphere-Biosphere Programme (IGBP) classifications, and land cover statistics in NHL permafrost and non-permafrost regions. ENF: Evergreen Needleleaf Forests; DNF: Deciduous Needleleaf Forests; MF: Mixed Forests; OSH: Open Shrublands; WSA: Woody Savannas; SAV: Savannas, GRA: Grasslands; WET: Wetlands; CRO: Cropland; Urban: Urban and Built-up Lands, Crop/Nature: Cropland/Natural Vegetation Mosaics.

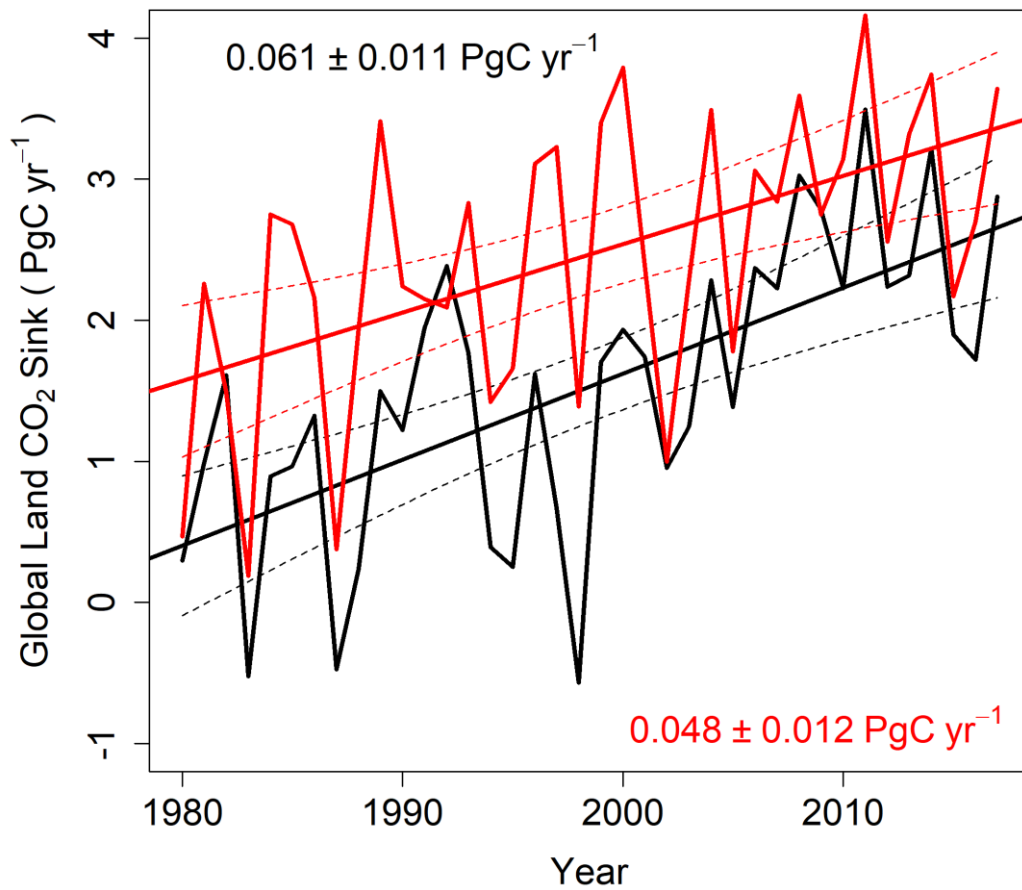

Fig. S2: Comparison of the estimated global land CO<sub>2</sub> sink trend from an ensemble of ACIs (black) and the global CO<sub>2</sub> budget 2020 (GCB2020, red); both assessments are correlated (Pearson's correlation  $r = 0.79$ ,  $p < 0.01$ ), while numbers in the figure represent the estimated net carbon uptake trends.

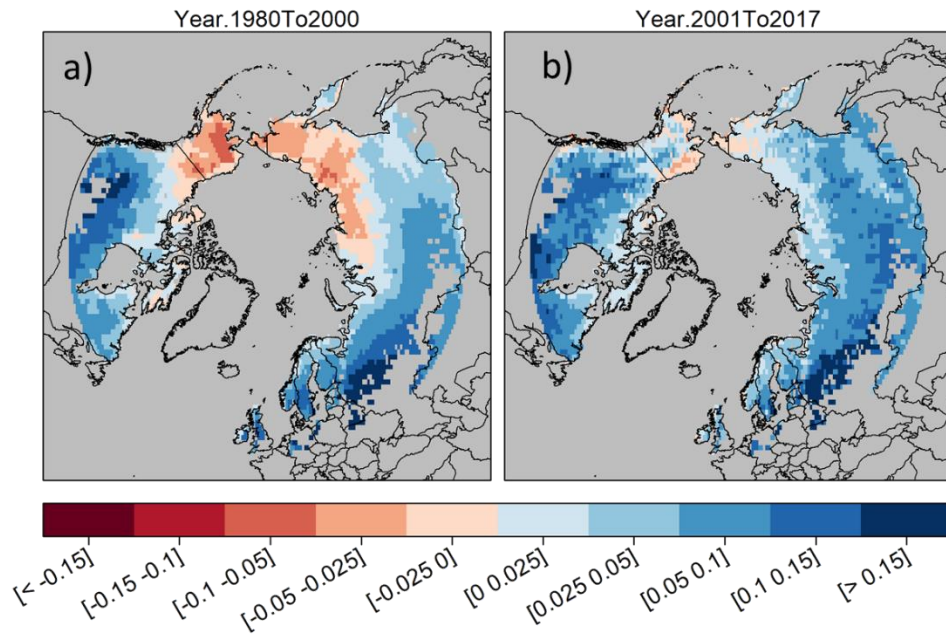

Fig. S3: Spatial patterns of annual net CO<sub>2</sub> uptake ( $\text{gC m}^{-2} \text{d}^{-1}$ ) using an ensemble mean of ACIs in the NHL between 1980-2000 (a) and 2001-2017 (b). Here we define the mass balance with respect to the biosphere, such that positive and negative numbers represent ecosystem net CO<sub>2</sub> uptake (blue shades) and losses (red shades). The ACI ensemble includes CarbonTracker (CT2019B), CarbonTracker Europe (CTE2020), CAMS, Jena CarboScope (s76\_v4.2 and s85\_v4.2), and JAMSTEC.

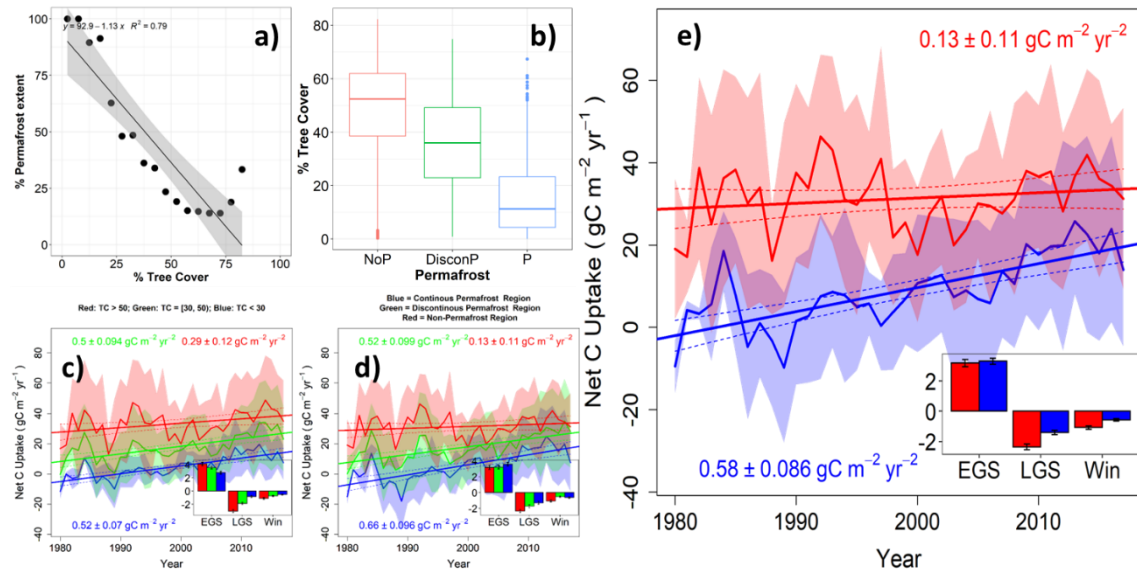

Fig. S4: Correlation between tree cover and permafrost extent at 5% intervals (a) and (b) regional scales. (c) Trends of annual net CO<sub>2</sub> uptake in low (blue color, TC < 30%), intermediate (green color, 30% < TC < 50%), high (red color, TC > 50%) tree cover regions. (d) Trends of annual net CO<sub>2</sub> uptake in continuous permafrost (blue color, P > 90%), discontinuous permafrost (green color, 10% < P < 90%), non-permafrost (red color, P < 10%) regions. (e) Trends of annual net CO<sub>2</sub> uptake in permafrost (blue color, P > 10%) and non-permafrost (red color, P < 10%) regions. in c-e, Numbers represent the net CO<sub>2</sub> uptake trend for each respective. Shading denotes 1 standard deviation (SD) from the 6 individual ACIs. Inset shows clear seasonal trends ( $\text{gC m}^{-2} \text{yr}^{-2}$ ) of increasing biospheric net CO<sub>2</sub> uptake in the early-growing season (EGS: May-Aug), and increasing net CO<sub>2</sub> release in the late-growing season (LGS: Sep-Oct) and winter (Win: Nov-Apr).



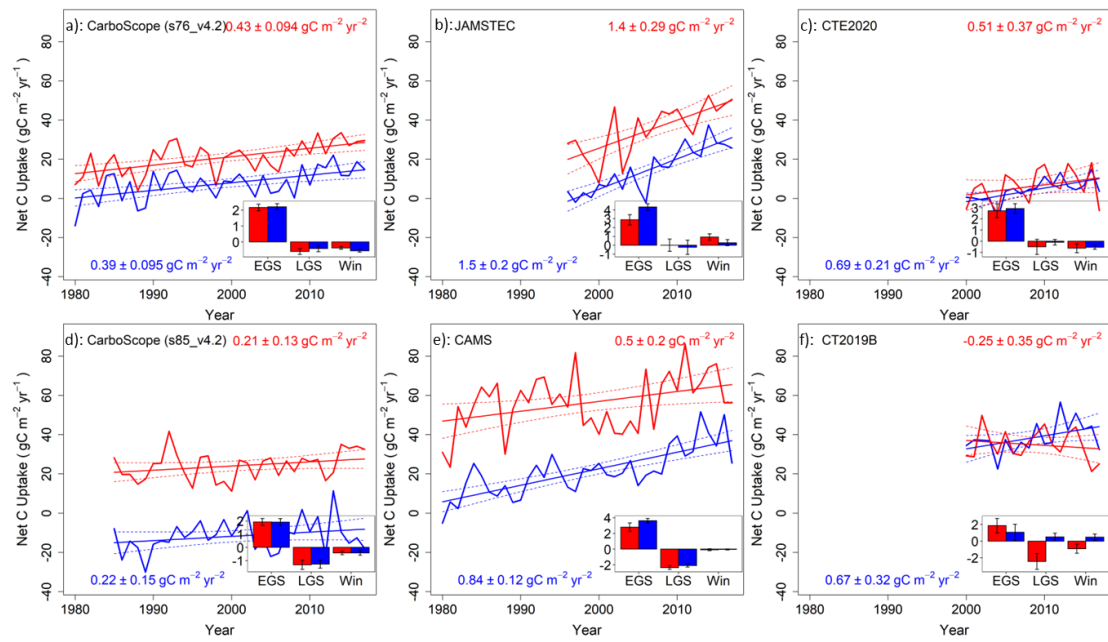

Fig. S5: Trends in net CO<sub>2</sub> uptake for different NHL regions and seasons based on individual ACIs (a: CarboScope s76\_v4.2, b: JAMSTEC, c: CTE2020, d: CarboScope s85\_v4.2, e: CAMS, f: CT2019B), where permafrost trends are plotted in blue and non-permafrost in red. The dotted lines denote 90% confidence intervals. Numbers in each subfigure represent the net CO<sub>2</sub> uptake trend (mean ± SD) for permafrost (in blue) and non-permafrost (in red) regions. Abbreviations: EGS, early growing season; LGS, late growing season; Win, winter.

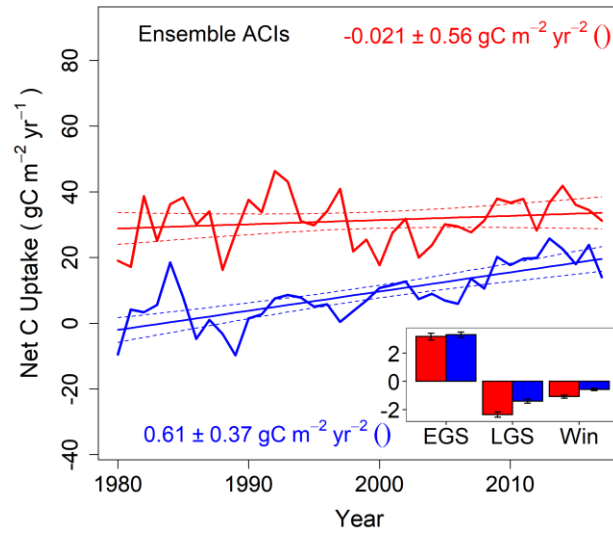

Fig. S6: Trends for net CO<sub>2</sub> uptake for different NHL regions and seasons based on random starting years and length of record ( $\geq 10$  years) using the ensemble of ACIs, where permafrost trends are plotted in blue and non-permafrost in red, and dotted lines denote 90% confidence intervals. Numbers represent the net CO<sub>2</sub> uptake trend (mean  $\pm$  SD) for permafrost (in blue) and non-permafrost (in red) regions. EGS, early growing season; LGS, late growing season; Win, winter.

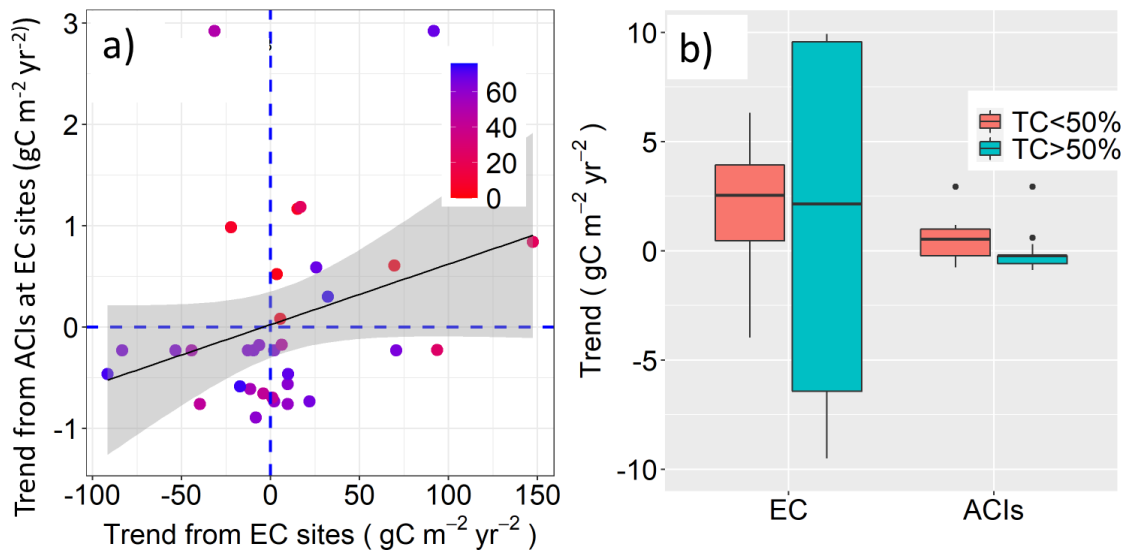

Fig. S7: Site-level comparison of trends using EC and ACIs at the EC site locations. Panel (a) shows the correlation between trends calculated from EC and ACIs at the EC site locations, colored by tree cover. Panel (b) shows the average trends calculated from EC and ACIs at the EC site locations at short-vegetated ( $\text{TC} < 50\%$ ) and tree-dominated ( $\text{TC} > 50\%$ ) regions.

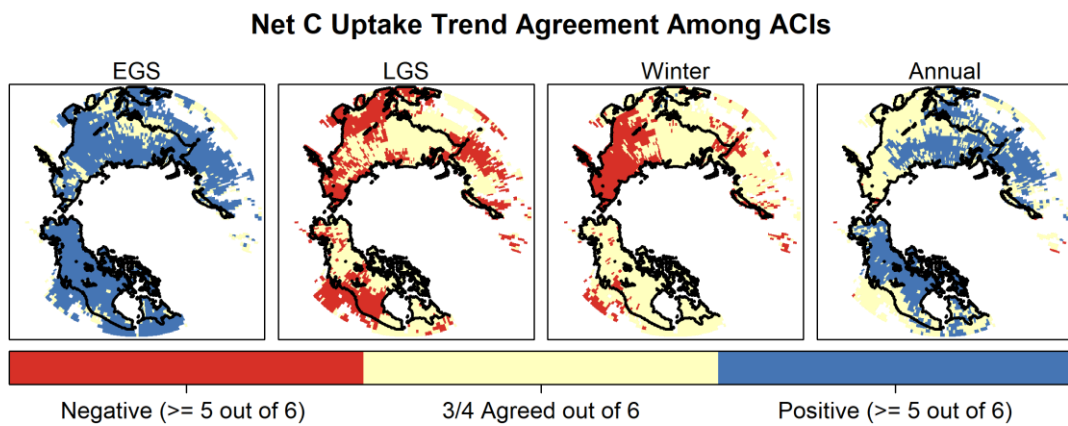

Fig S8. Spatial trend agreement of net CO<sub>2</sub> uptake trends from the different ACIs. In the legend, Negative [**Positive**] indicate at least 5 of 6 ACIs showed decreasing [**increasing**] net CO<sub>2</sub> uptake trends and can be an indicator for high agreement or low uncertain among different inversion data. The 3/4 agreed out of 6 indicates that the only 3 or 4 of 6 ACIs showed a decreasing [**increasing**] net CO<sub>2</sub> uptake trend, and can be an indicator for relatively low agreement or high uncertainty among different inversion data. EGS, early growing season; LGS, late growing season; Win, winter.

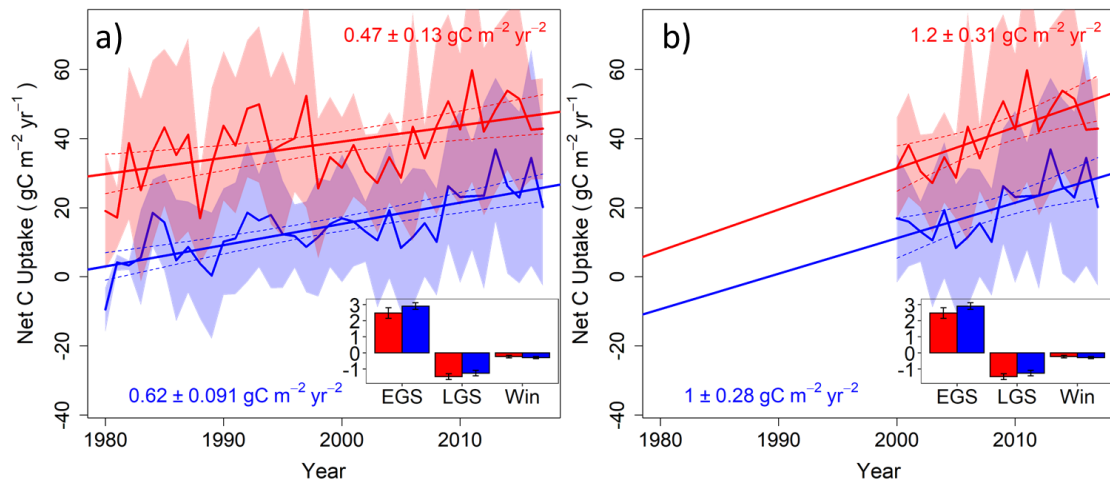

Fig S9. ACI trends of net CO<sub>2</sub> uptake derived using two continuous data records available since 1980 (a, CAMS, and Jena CarboScope (s76)) and ACI data records only available after 2000 (b, CT2020B, CTE2020, and JAMSTEC). Numbers represent the net CO<sub>2</sub> uptake trend (mean ± SD) for permafrost (in blue) and non-permafrost (in red) regions. EGS, early growing season; LGS, late growing season; Win, winter.

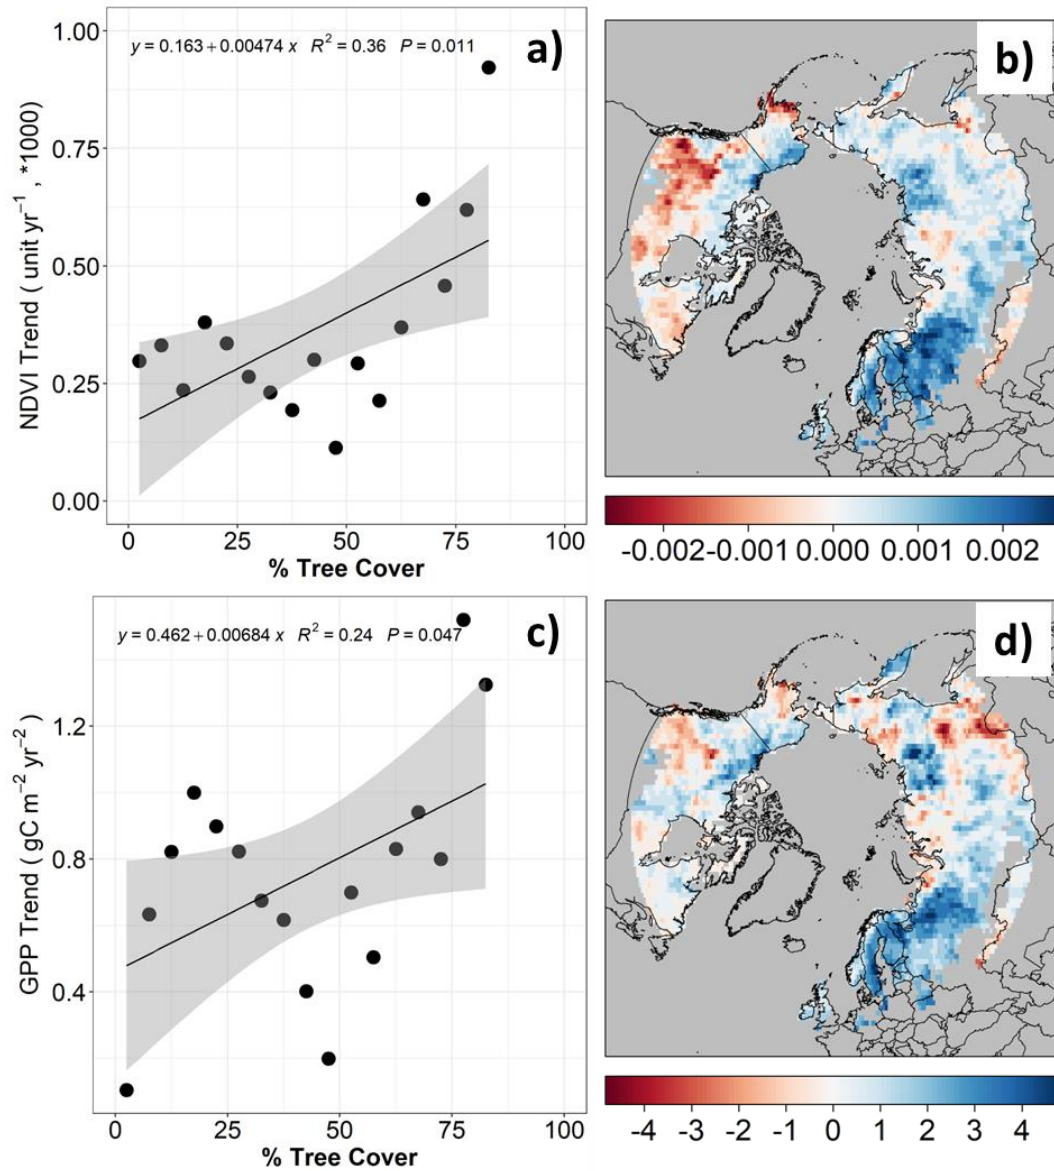

Fig S10. Trend of GPP is increasing faster with higher tree cover, contradicting trends of net CO<sub>2</sub> uptake, and therefore rejecting H1. Panels (a) and (c) are trends of GIMMS NDVI or LUE GPP and along 5% tree cover interval gradient, respectively. Panels (b) and (d) are spatial patterns of trends for GIMMS NDVI or LUE GPP, respectively.

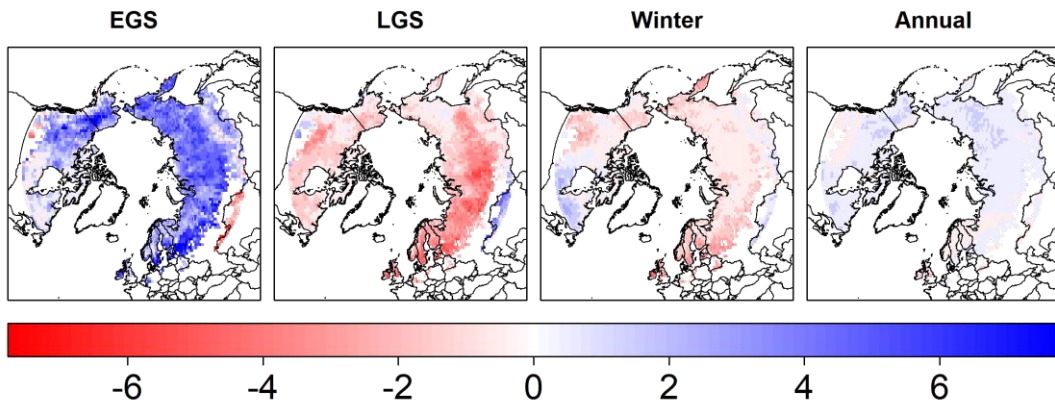

Fig 11. The spatial patterns of trends in net CO<sub>2</sub> uptake ( $\text{gC m}^{-2}\text{yr}^{-2}$ ) from 1980 to 2017 based on ensemble mean of six ACIs. Positive trends (blue color) indicated enhancement of net CO<sub>2</sub> uptake. Abbreviations: EGS, early growing season; LGS, late growing season.

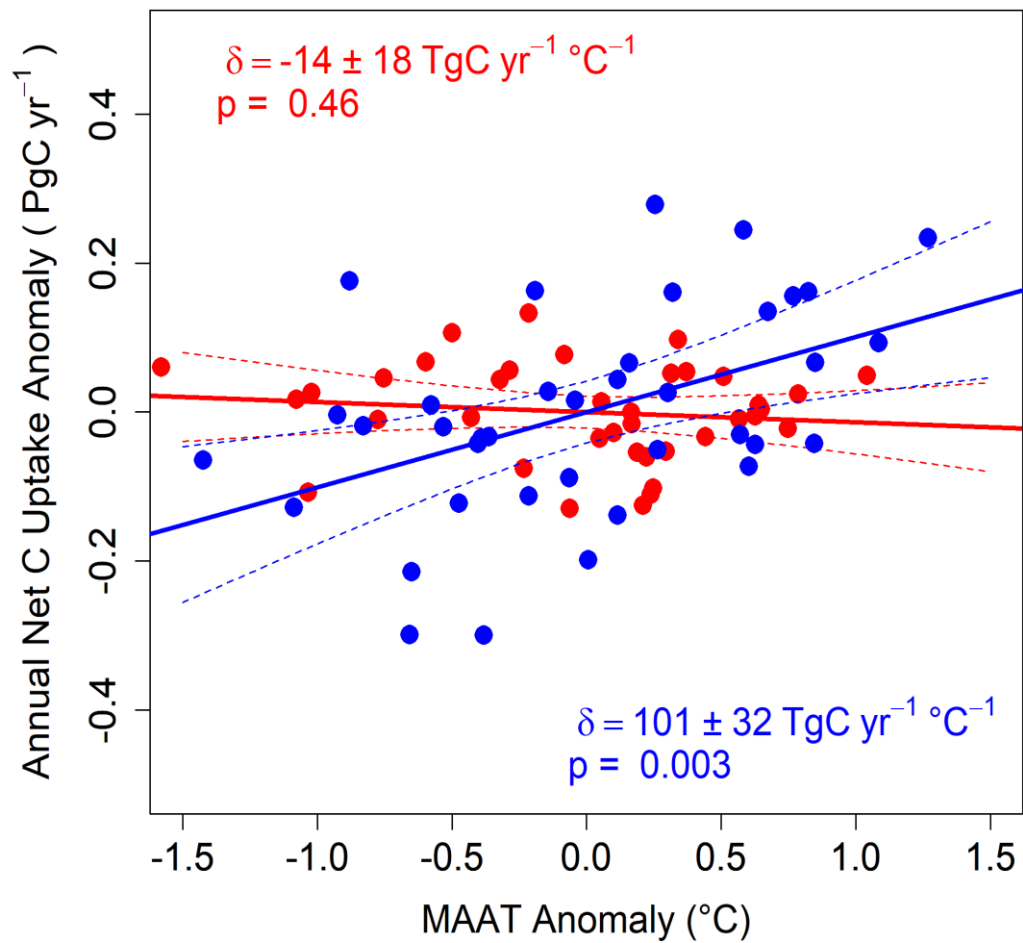

Fig S12 Relationship between annual net CO<sub>2</sub> uptake anomaly and mean annual temperature (MAAT) anomaly for permafrost (blue) and non-permafrost (red) NHL regions. Numbers indicate the temperature sensitivity (TgC yr<sup>-1</sup> K<sup>-1</sup>) for the different NHL regions.



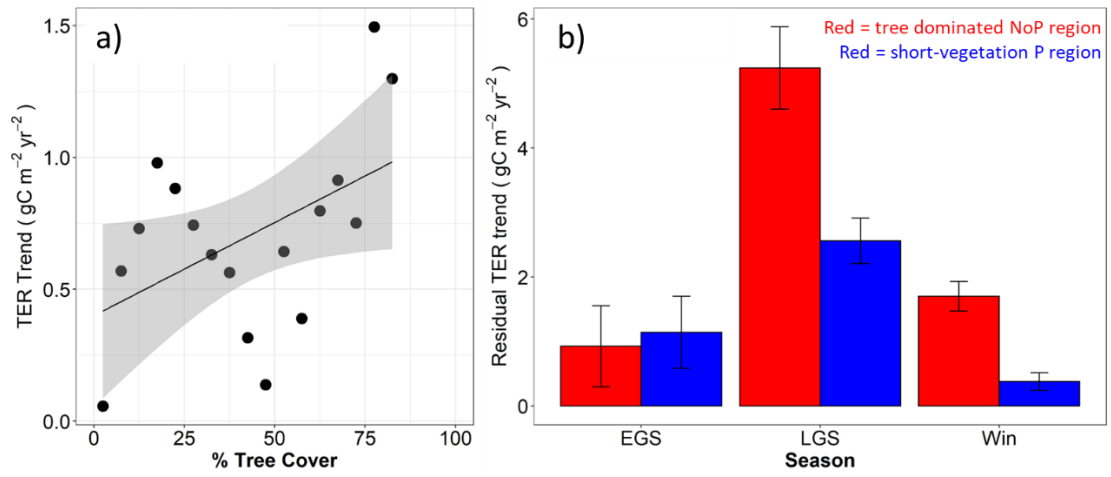

Fig S13 Trends of annual residual total ecosystem respiration (TER) along the tree cover gradient (a) and seasonal TER for the different NHL regions (b). Abbreviations: EGS, early growing season; LGS, late growing season.

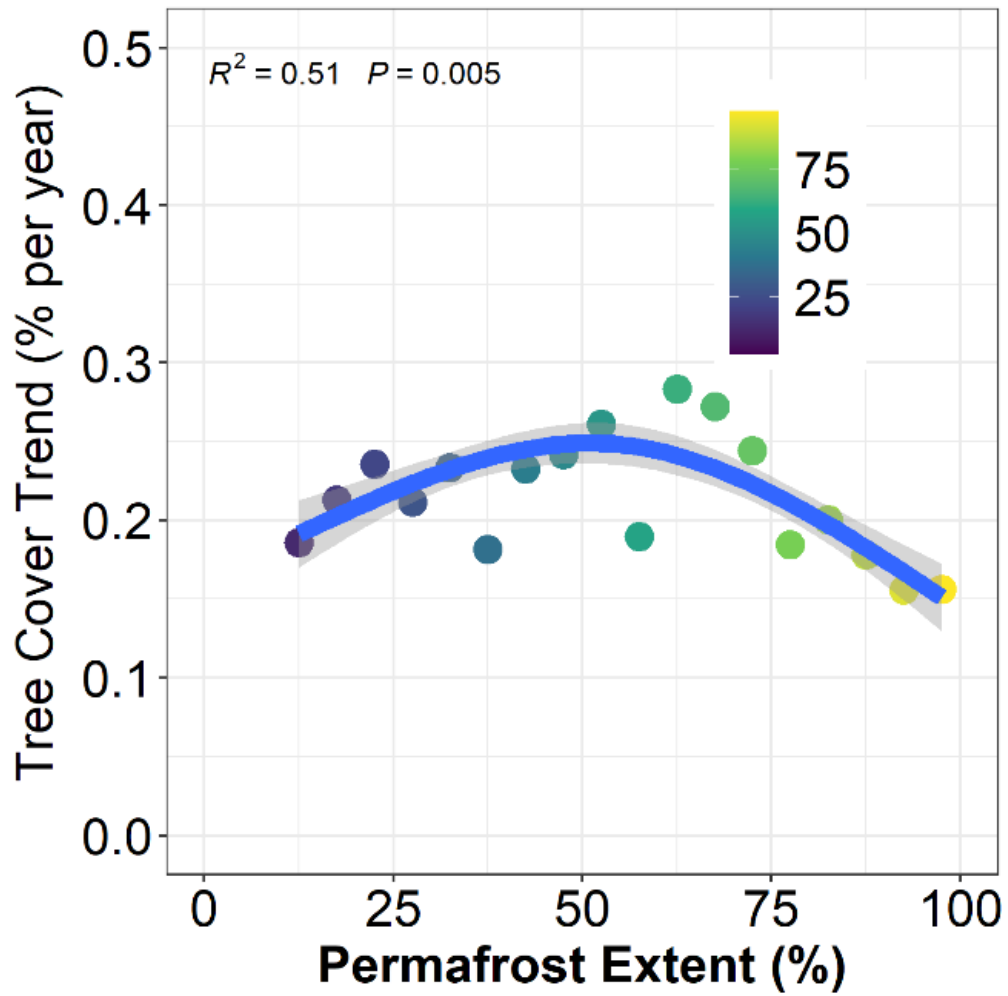

Fig S14 Relationship between tree cover trend (% per year) and permafrost extent (% , right) at 5% intervals, colored by tree cover.

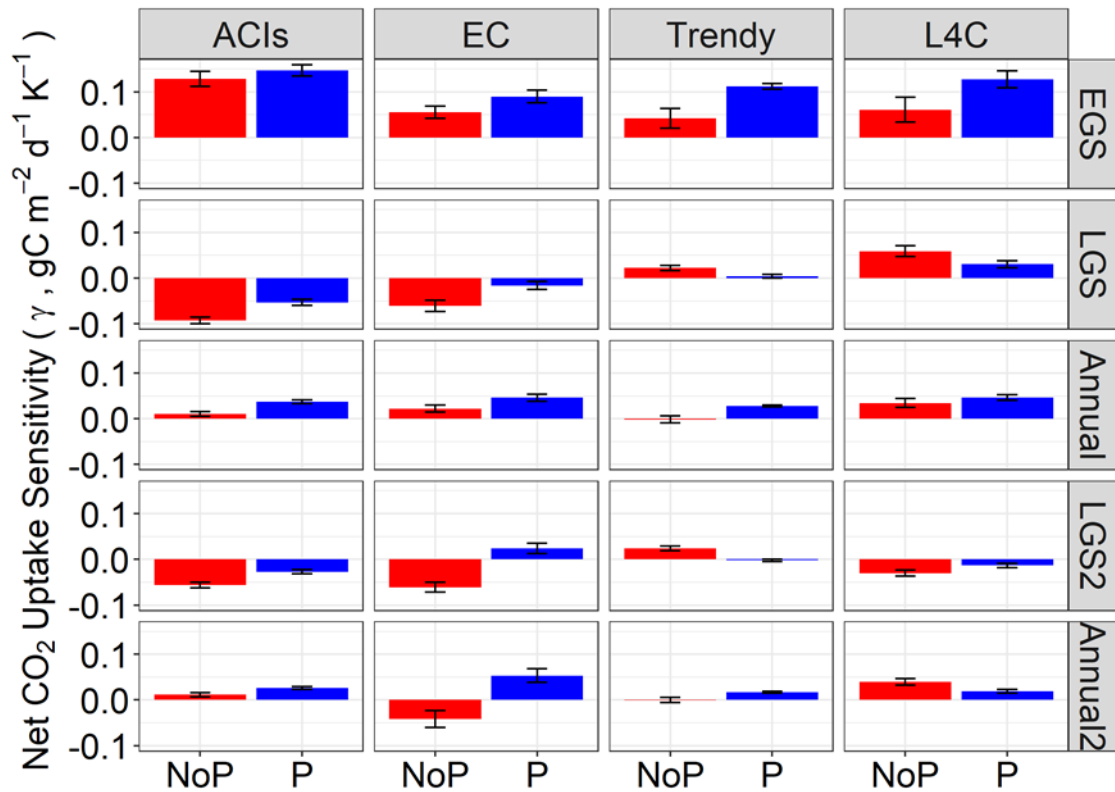

Fig. S15. The direct and lagged effects of temperature to seasonal net CO<sub>2</sub> uptake in short-vegetated permafrost (P) and tree-dominated non-permafrost (NonP) regions using ACIs, EC, and TRENDY assessments. The lagged effects of temperature was quantified by sensitivity of net CO<sub>2</sub> uptake in early growing season (EGS), late growing season (LGS) and annual (Annual) in response to spring (May -June) temperature. The direct effects of temperature were quantified by sensitivity of net CO<sub>2</sub> uptake in late growing season (LGS2) and annually (Annual2) in response to the same season temperature. Sensitivity ( $\gamma$ : gC m<sup>-2</sup> day<sup>-1</sup> K<sup>-1</sup>) is the change in net CO<sub>2</sub> flux (gC m<sup>-2</sup> day<sup>-1</sup>) in response to a 1°C temperature change in the Spring.

### Supplementary References

- 1 Pastorello, G. *et al.* The FLUXNET2015 dataset and the ONEFlux processing pipeline for eddy covariance data. *Sci Data* **7**, 225, doi:10.1038/s41597-020-0534-3 (2020).

*Supplementary text for*

**Mixed effects model analysis of net CO<sub>2</sub> trends over permafrost and non-permafrost regions using ACIs**

***1. Understanding the uncertainty in ACI estimates and its effects on trend estimates***

To understand the uncertainty in ACI estimates and its effects on trend estimates, we use the general linear mixed effects model (GLMM) to investigate the uncertainty in ACI estimates from: (1) spread across different ACIs; (2) time-dependent differences in spread across ACI estimates; and (3) differences among ACIs in partitioning of fluxes between permafrost (PF) and non-permafrost (noPF) regions. Instead of using the ensemble mean across ACIs to estimate trends, we use the individual ACI monthly time-series to estimate the trends. Here, we use the regionally-integrated flux (i.e. units in TgC yr<sup>-1</sup>) to estimate the trend. The areal flux (i.e. units in gC m<sup>-2</sup> yr<sup>-1</sup>) produced similar results, assuming no change in areal extent of PF vs. noPF regions (results not shown). First, to understand how these factors (1-3) affect flux estimates, we fit a GLMM model using 6 ACIs (*i*) x 2 PF/noPF (*p*) x (18-38) years (*j*) and consider (1)-(3) as random effects:

$$(1) \quad \text{NEE} = \mu + \alpha_i + \beta_{ij} + \gamma_{ip} + \varepsilon_{ijp}$$

Where  $\mu$  is the average bias (intercept of the model),  $\alpha_i$  describes variability across ACIs (1 as described above),  $\beta_{ij}$  variability across ACIs x years (spread may be larger in some years than others, 2 as described above),  $\gamma_{ip}$  is the spread across ACIs x PF (spread may be related with differences among ACIs in PF/noPF, 3 as described above) and  $\varepsilon_{ijp}$  is a residual term. These coefficients indicate the relative influence of each factor on the trends estimate.

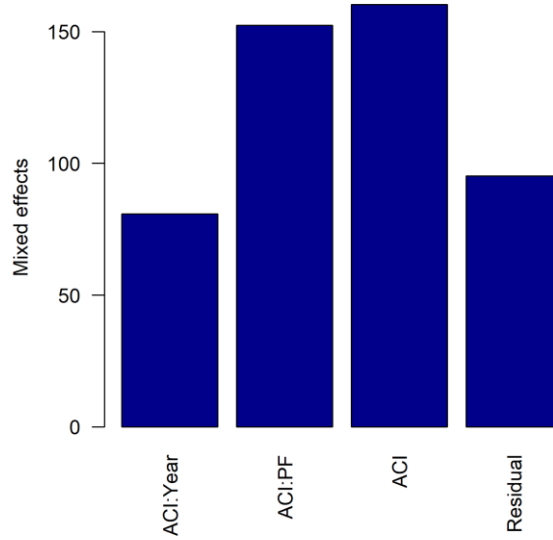

Figure 1. Coefficients for the mixed effects from the GLMM fit in Eq. 1. *ACI:Year*, *ACI:PF*, *ACI*, and *Residual* correspond to  $\beta_{ij}$ ,  $\gamma_{ip}$ ,  $\alpha_i$ , and  $\varepsilon_{ijp}$  respectively.

Figure 1 suggests variability across *ACI* inversions (1) have the strongest influences on trends, followed by *ACIs* in PF and no PF regions (2) and variability between inversions-years (3), which may indicate inversions differ in the trends. This points to the distinction between PF and no PF regions and temporal variability as important factors explaining variance of net CO<sub>2</sub> trends.

We therefore tested a second model, in which we assumed that differences between *ACIs* can additionally be due to (i) variability between years, including possible trends ( $\delta_j$ ), (ii) differences between PF and no PF regions ( $\zeta_p$ ) and (iii) differences between PF regions and years ( $\kappa_{pj}$ ):

$$(2) \quad NEE = \mu + \alpha_i + \beta_{ij} + \gamma_{ip} + \delta_j + \zeta_p + \kappa_{pj} + \varepsilon_{ijp}$$

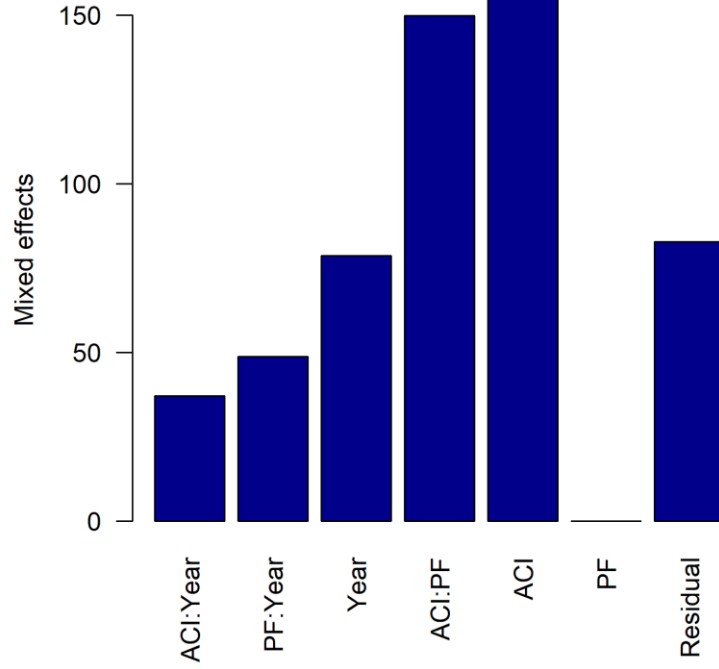

Figure 2. Coefficients for the mixed effects from the GLMM fit in Eq. 2. ACI:Year, PF:Year, Year, ACI:PF, ACI, PF, and residual correspond to  $\beta_{ij}$ ,  $\kappa_{pj}$ ,  $\delta_j$ ,  $\gamma_{ip}$ ,  $\alpha_i$ ,  $\zeta_p$ , and  $\varepsilon_{ijp}$  respectively.

The model from Eq. 2 provides a significantly better fit to the data than the model from Eq. 1., given by ANOVA analysis (R package anova). The Eq. 2 model conditional  $R^2$  is 0.83.

Coefficients from Eq. 2 suggest that, in addition to 1-3, temporal variability in NEE ( $\delta_j$ ) and differences between PF regions and years ( $\kappa_{pj}$ ) are also important contributors to trend estimates.

Finally, we define a set of models with different combinations of the two fixed and random effects explored before. We start with the full model (Eq. 3.) and select the model that provides the best fit based on the conditional  $R^2$ , using ANOVA.

$$(3) \quad NEE = aX_j + bX_{pj} + \mu + \alpha_i + \beta_{ij} + \gamma_{ip} + \delta_j + \zeta_p + \kappa_{pj} + \varepsilon_{ijp}$$

$$(4, \text{ best model}) \quad NEE = aX_j + \mu + \alpha_i + \beta_{ij} + \gamma_{ip} + \delta_j + \zeta_p + \kappa_{pj} + \varepsilon_{ijp}$$

Where  $X_j$  is time in years and  $a$  corresponds to the NEE trend, and  $b$  expresses an interaction term between trend and PF/noPF. The ANOVA indicates that Eq. 4. is significantly better (conditional  $R^2 =$

0.92) than the full model (Eq. 3., conditional  $R^2 = 0.74$ ). These analyses indicate that IAV or spread across different ACIs, and differences between PF and no PF regions have strong influences on net CO<sub>2</sub> trends.

## 2. Comparing trend estimates from different models

The previous analysis supports an important role of PF presence and differences in trends in permafrost and non-permafrost (PF vs. NoPF) regions. Therefore, we compare the best performing GLMM models (Eq. 4) with those from simple linear regression model (LRM) fits to the dataset with individual ACIs (Eq. 5), as well as with the ensemble mean of ACIs (Eq. 5) to see if different models produce significantly different trend estimates:

$$(5) \text{ NEE} = aX_{ij} \text{ (LRM, using individual monthly ACI time-series)}$$

$$(6) \text{ NEE} = aX_j \text{ (LRM, using ensemble mean monthly ACI time-series)}$$

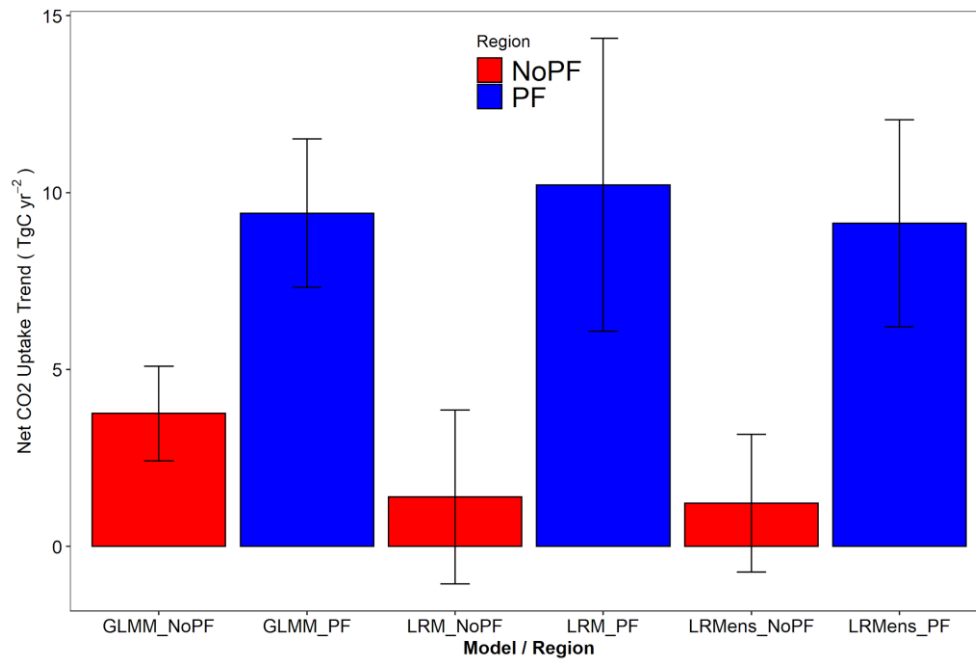

Figure 3. Trends estimated separately for permafrost (PF; blue) and non-permafrost (NoPF; red) regions, including random effects from ACI uncertainty (GLMM, Eq. 4), compared to results from the LRM using individual ACIs (LRM, Eq. 5) or the ensemble mean of ACIs (LRMens, Eq. 6).

Figure 3 shows that after accounting for the uncertainty in ACIs, the trend of net CO<sub>2</sub> uptake in permafrost regions (i.e. GLMM\_P) is comparable to simple linear regression (i.e. LRM\_P and LRMens\_P). The trend of net CO<sub>2</sub> uptake in non-



permafrost regions is slightly higher after accounting for uncertainty in ACIs (i.e. GLMM\_NoP), but is not significantly different from the linear regression models (LRM\_NoP and LRMens\_NoP). However, all models show that the trend of net CO<sub>2</sub> uptake is significantly higher in permafrost regions than non-permafrost regions, and there is no significant difference in net CO<sub>2</sub> uptake trends across different models.

Therefore, after considering multiple sources of uncertainty affecting the ACI estimates in our GLMM approach, the difference between trends in permafrost and non-permafrost regions is slightly reduced, but the trends remain significantly different.
